# Supplementary material for: Disulfide modified self-assembly of lipopeptides with arginine-rich periphery achieve excellent gene transfection efficiency at relatively low nitrogen to phosphorus ratios
Source: Royal Society of Chemistry journal article supplement (doi:10.1039/c6tb02945k), 2017-01-01
Supplement: c6tb02945k1.pdf [file c6tb02945k1.pdf]

Supplementary information for

**Great surprise, but make sense: disulfide modified self-assembly lipopeptides with arginine-rich periphery achieves excellent gene transfection efficiency at relatively low nitrogen to phosphorus ratios**

Xiaobing Chen <sup>a, †</sup>, Jun Yang <sup>b, †</sup>, Hong Liang <sup>a</sup>, Qian Jiang <sup>a</sup>, Bowen Ke <sup>b, \*</sup>, Yu Nie <sup>a, \*</sup>

<sup>a</sup> National Engineering Research Center for Biomaterials, Sichuan University, No. 29, Wangjiang Road, Chengdu 610064, P. R. China.

<sup>b</sup> Neuroscience Center of West China Hospital, Sichuan University, Chengdu, Sichuan, 610041, P. R. China

<sup>†</sup> Equal contribution to the manuscript as co-first authors

<sup>\*</sup> Corresponding authors

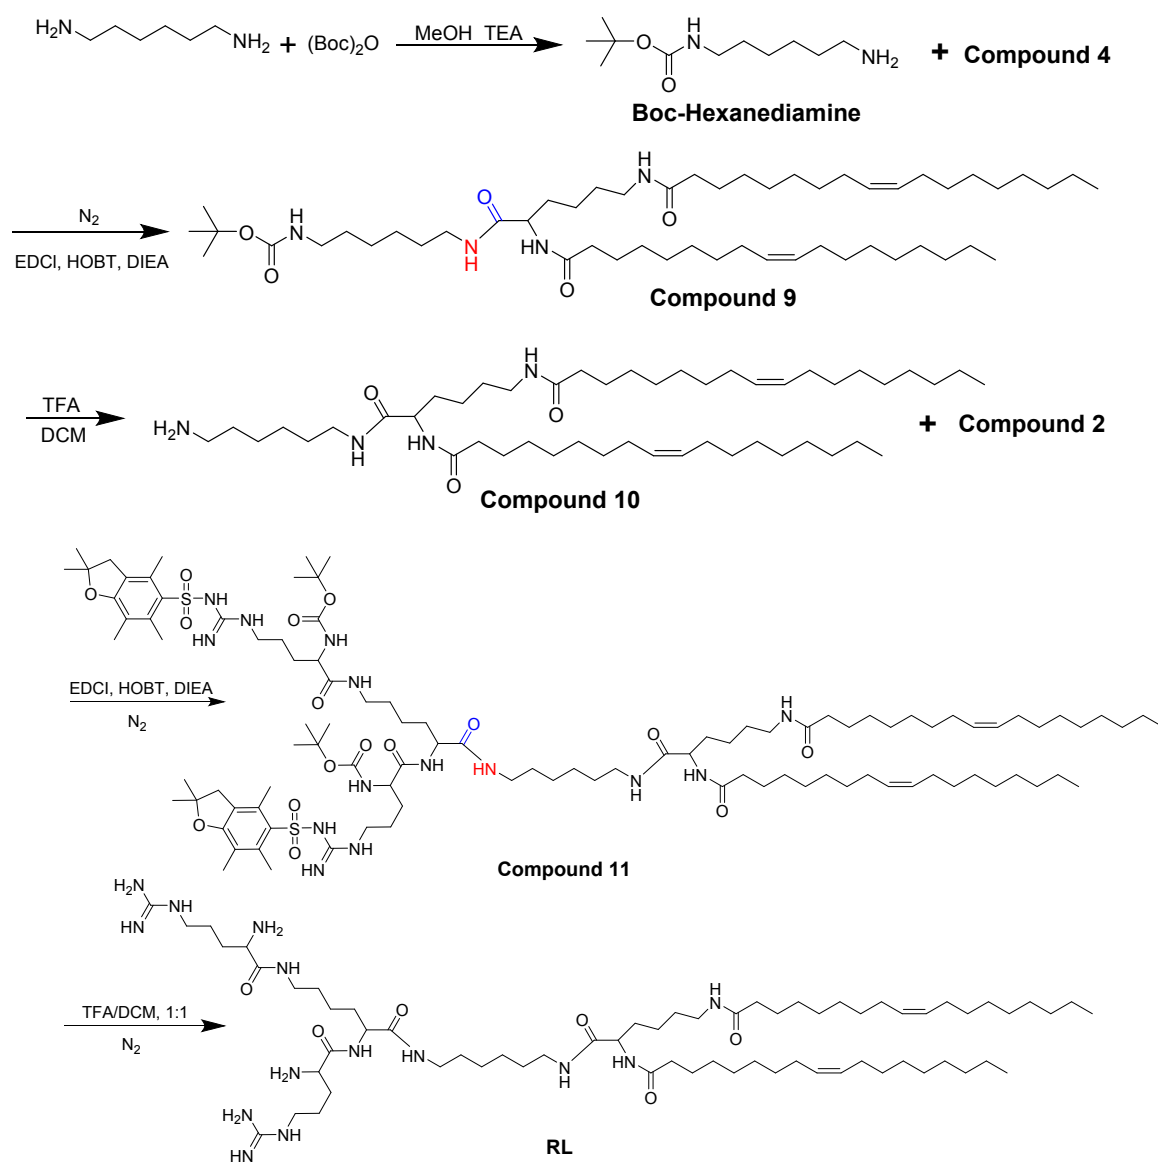

**Figure S1.** Synthesis of non-disulfide modified lipopeptides with arginine-rich periphery (RL).

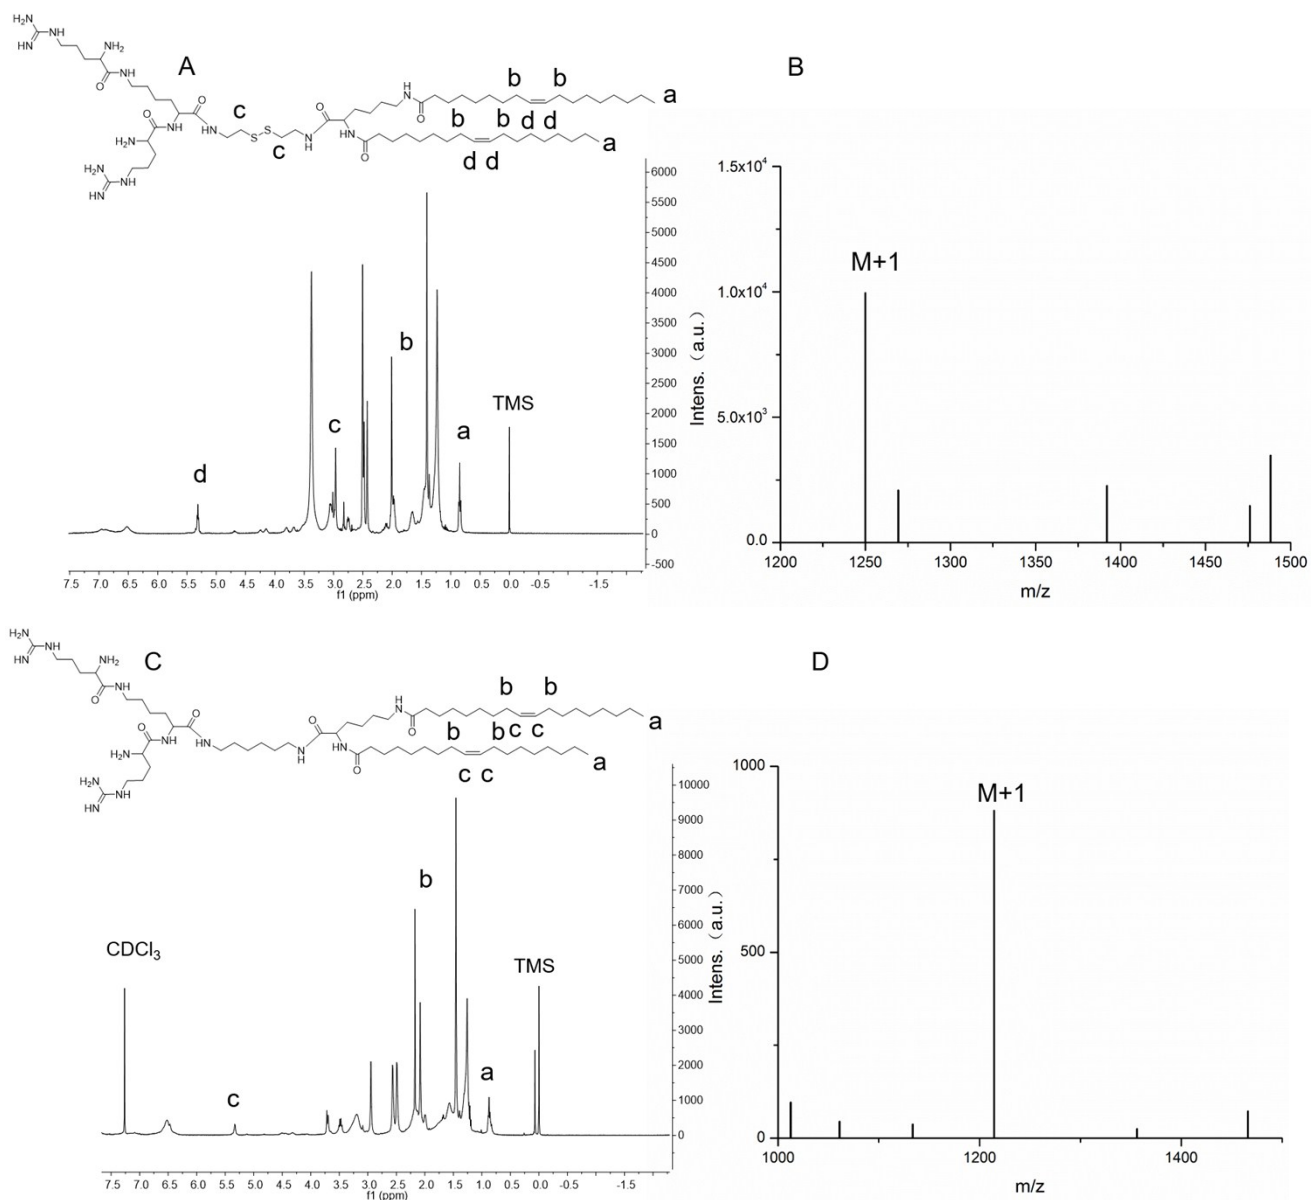

**Figure S2.** Chemical characterization ( $^1\text{H}$ -NMR spectrum and ESI-MS) of RLS and RL. (A)  $^1\text{H}$ -NMR of RLS. (B) MS (ESI) of RLS:  $[M+H^+] = 1249.9$ . (C)  $^1\text{H}$ -NMR of RL. (D) MS (ESI) of RL:  $[M+H^+] = 1214.9$ .

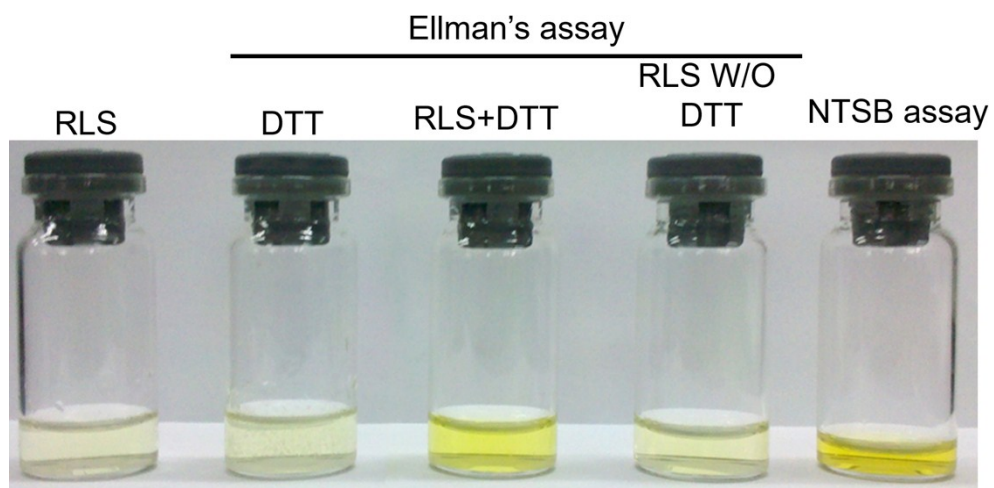

**Figure S3.** The color variance of RLS in Ellman's assay and NTSB assay.

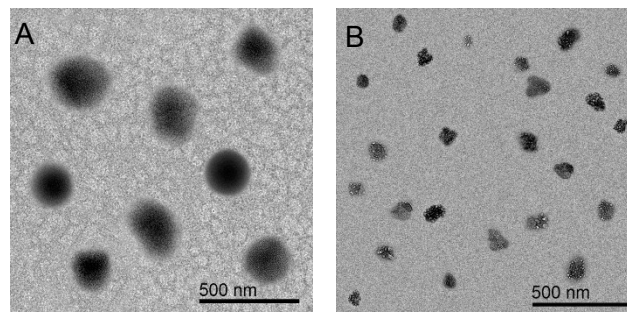

**Figure S4.** TEM images of RLS lipoplexes at N/P ratios of 5 (A) and 10 (B).

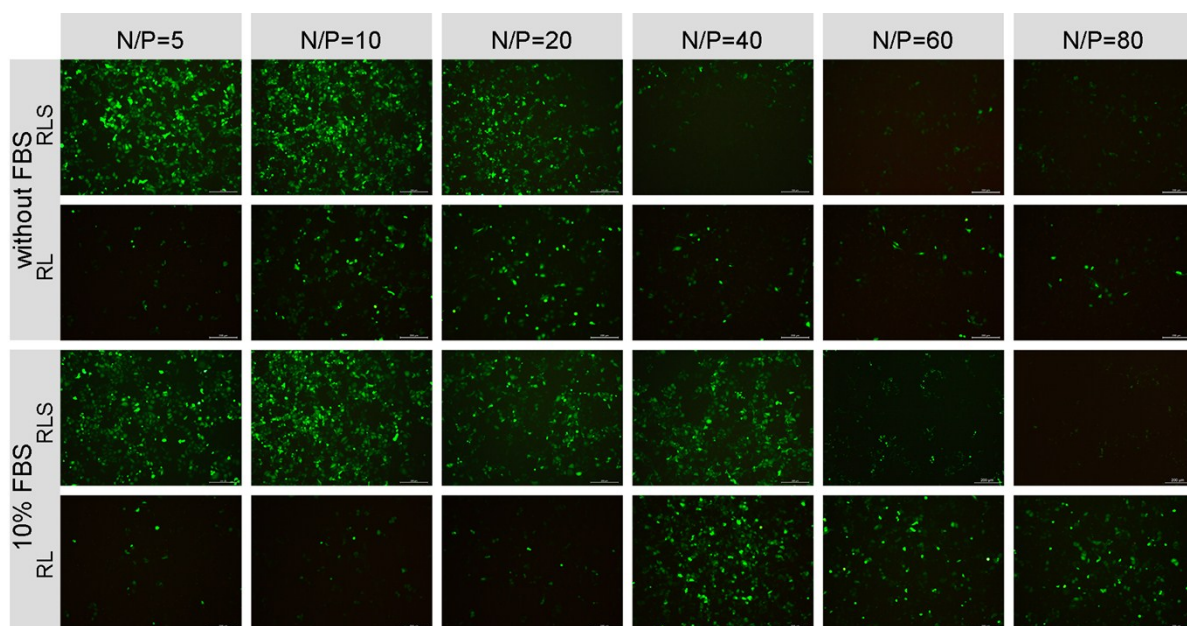

**Figure S5.** Fluorescence microscopy images of cells with EGFP transfection at different N/P ratios of 5-80 in HeLa cell line. The scale bar was 200  $\mu\text{m}$ .

**A**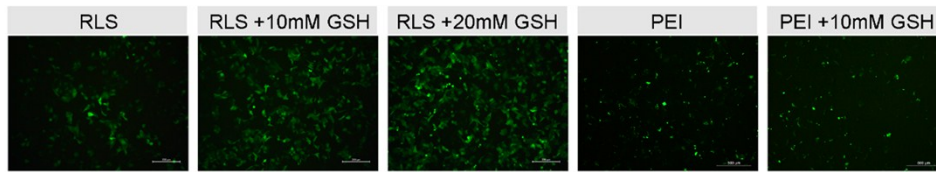**B**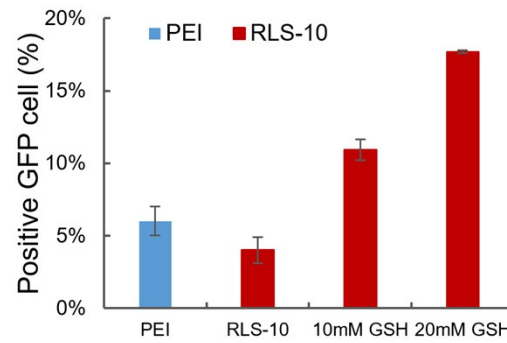

**Figure S6.** (A) HepG2 cells were treated with two different concentration of GSH for 2.5 h before EGFP transfection. HepG2 cells without incubation of GSH were as control. (B) Semi-quantitative evaluation of RLS/EGFP complexes in HepG2 cells with incubation of GSH by Image Pro 6.0.

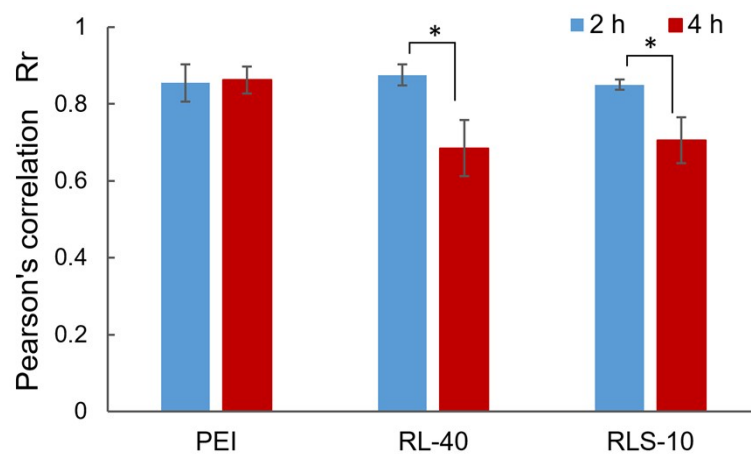

**Figure S7.** The colocalization ratio of red fluorescence of Cy5-labeled DNA with the green fluorescence of LysoSensor Yellow/Blue DND-160 after cells were treated with different complexes for 2 h and 4 h. \* $p < 0.05$ .



**Table S1.** Determination of amount of thiol/disulfide groups on lipids

| Samples    | Thiol/disulfide bonds ( $\mu\text{mol}/\text{mg}$ cationic lipid) |                 |
|------------|-------------------------------------------------------------------|-----------------|
|            | Theoretical values                                                | Measured values |
| compound 7 | 11.7/5.85                                                         | 10.5/5.85       |
| RLS        | 3.68/1.84                                                         | 3.62/1.82       |
